# Supplementary material
Source: Springer Nature journal article supplement (https://www.springermedizin.de/resource/supplementary/12889_2014_6605_MOESM1_ESM.pdf/9498632)
Supplement: MOESM1 [file 9498632]

## Enrollment

Assessed for eligibility (n=797)

Excluded (n= 397)

- ◆ Not meeting inclusion criteria (n= 243)
- ◆ Declined to participate (n=4)
- ◆ Ineligible for current study, but screened into a sub-study (n=150)

Randomized (n=400)

## Baseline Allocation

Allocated to *Hombre Seguro* intervention (n=200)

- ◆ Received allocated intervention (n=200)

Allocated to control group (n=200)

- ◆ Received allocated intervention (n=200)

## 4 Mo. Follow-Up

Completed follow-up assessment (n=174, 87%)

Lost to follow-up because

- Unable to locate (n=24)
- Participant in jail (n=2)

Completed follow-up assessment (n=160, 80%)

Lost to follow-up because

- Unable to locate (n=32)
- Participant in jail (n=5)
- Participant deceased (n=2)
- Participant in rehab (n=1)

## 8 Mo. Follow-Up

Completed follow-up assessment (n=169, 85%)

Lost to follow-up because

- Unable to locate (n=25)
- Participant in jail (n=5)
- Participant deceased (n=1)

Completed follow-up assessment (n=155, 78%)

Lost to follow-up because

- Unable to locate (n=28)
- Participant in jail (n=11)
- Participant deceased (n=2)
- Participant in rehab (n=4)

## 12 Mo. Follow-Up

Completed follow-up assessment (n=177, 89%)

Lost to follow-up because

- Unable to locate (n=21)
- Participant deceased (n=1)
- Participant in jail (n=1)

Completed follow-up assessment (n=168, 84%)

Lost to follow-up because

- Unable to locate (n=28)
- Participant deceased (n=2)
- Participant in jail (n=1)
- Participant in rehab (n=1)

## Analysis

Analyzed (n=200)

Analyzed (n=200)
